# Supplementary material for: Synthesis and characterisation of alkaline earth bis(diphenylphosphano)metallocene complexes and heterobimetallic alkaline earth metal/platinum(ii) complexes [Ae(thf)x(η5-C5H4PPh2)2Pt(Me)2] (Ae = Ca, Sr, Ba)
Source: Royal Society of Chemistry journal article supplement (doi:10.1039/c1dt11324k), 2011-10-21
Supplement: c1dt11324k.pdf [file c1dt11324k.pdf]

Electronic Supplementary Information (ESI)

**Synthesis and characterisation of alkaline earth diphenylphosphanometallocene complexes and heterobimetallic alkaline earth metal/platinum(II) complexes [Ae(thf)<sub>x</sub>(η<sup>5</sup>-C<sub>5</sub>H<sub>4</sub>PPh<sub>2</sub>)<sub>2</sub>Pt(Me)<sub>2</sub>] (Ae = Ca, Sr, Ba)**

Daisy P. Daniels<sup>1</sup>, Glen B. Deacon<sup>1\*</sup>, Dominique Harakat<sup>2</sup>, Florian Jaroschik<sup>1,2</sup> and Peter C. Junk<sup>1\*</sup>

<sup>1</sup> *School of Chemistry, P.O. Box 23, Monash University, Clayton, Vic., 3800, Australia.*

<sup>2</sup> *Institut de Chimie Moléculaire de Reims, CNRS (UMR 6229), Université de Reims, 51687 Reims Cedex 2, France.*

\* *Author to whom correspondence should be addressed.*

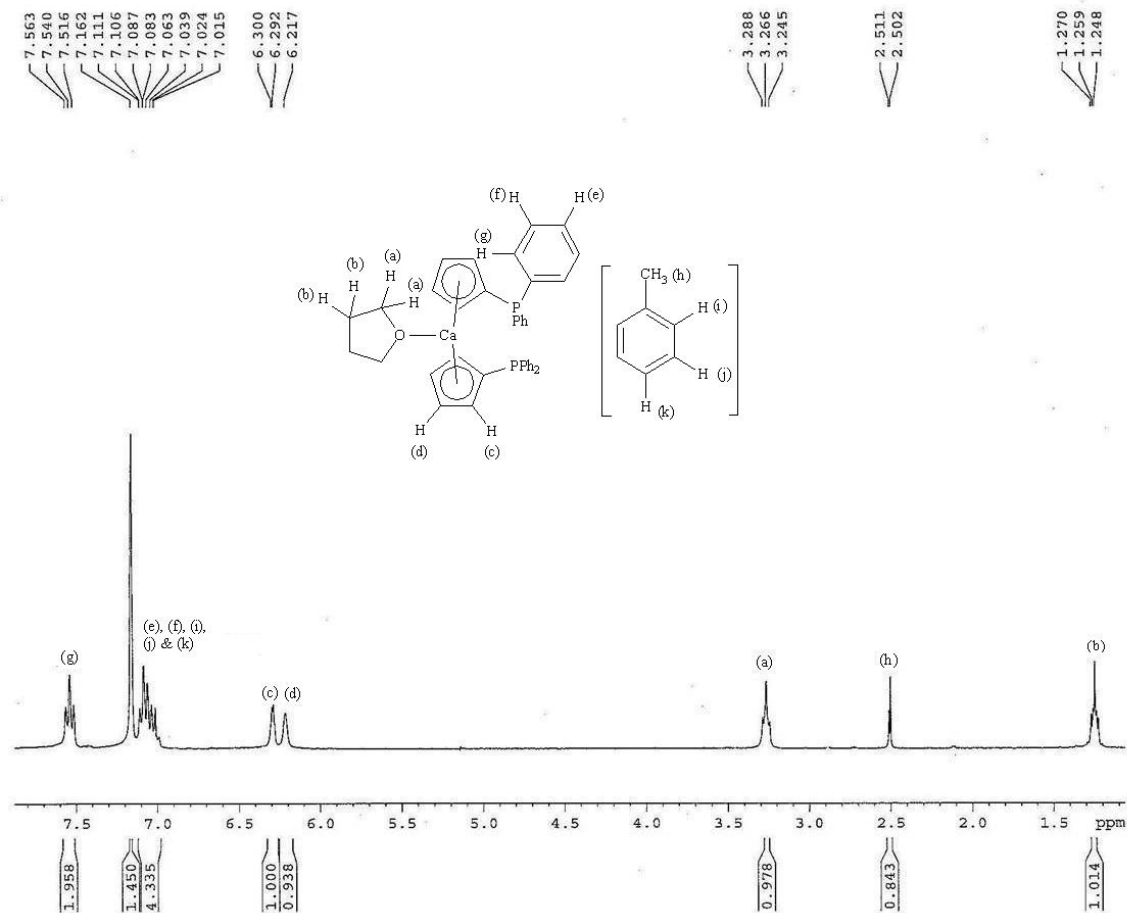

**Figure S1.** <sup>1</sup>H NMR spectrum of **6a** in C<sub>6</sub>D<sub>6</sub> at room temperature showing the 2:1:1 ratio of C<sub>5</sub>H<sub>4</sub>PPh<sub>2</sub>: thf: toluene.

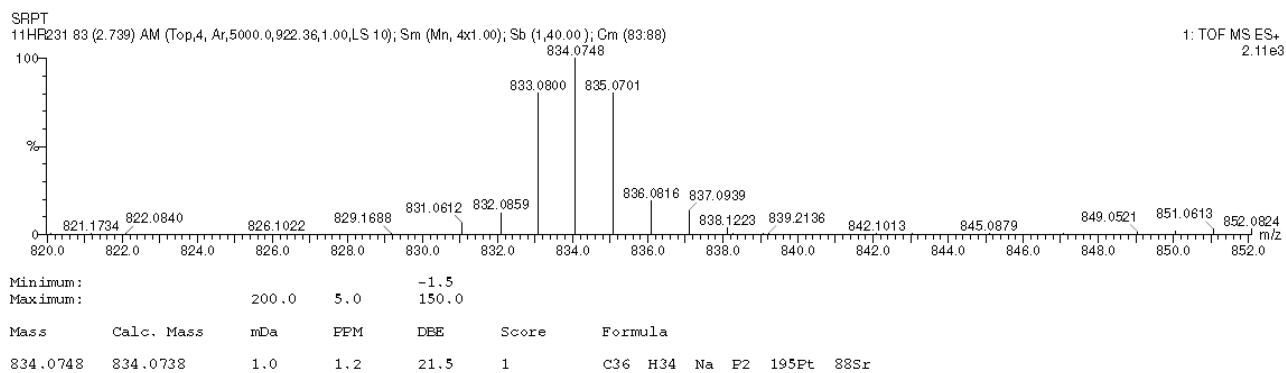

**Figure S2.** HRMS spectrum of **10** in thf/acetonitrile in the positive mode showing [M+Na]<sup>+</sup> at m/z 834.0748.

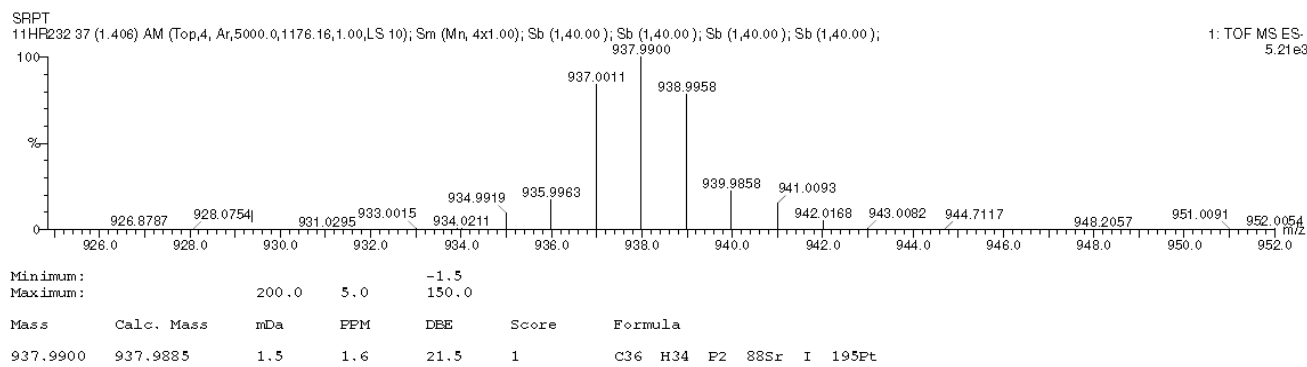

**Figure S3.** HRMS spectrum of **10** in thf/acetonitrile in the negative mode showing  $[M+I]^-$  at  $m/z$  937.9900.
